# Supplementary material for: Cost-effectiveness of Latent Tuberculosis Infection Screening before Immigration to Low-Incidence Countries
Source: Emerg Infect Dis. 2019 Apr;25(4):661–71. doi: 10.3201/eid2504.171630 (PMC6433018; doi:10.3201/eid2504.171630)
Supplement: Appendix — Additional information about cost-effectiveness of latent tuberculosis infection screening before immigration to low-incidence countries. [file 17-1630-Techapp-s1.pdf]

# Cost-effectiveness of Latent Tuberculosis Infection Screening before Immigration to Low-Incidence Countries

## Appendix

### Cost-effectiveness Ratio Calculation

To calculate the incremental cost-effectiveness ratio (ICER), the difference in costs between an intervention strategy ( $Cost_i$ ) and the base case ( $Cost_b$ ) is divided by the difference in quality-adjusted life years (QALYs) between an intervention strategy ( $QALY_i$ ) and the base case ( $QALY_b$ ). This is calculated through the formula:

$$ICER = \frac{Cost_i - Cost_b}{QALY_i - QALY_b}$$

This value can then be compared to a policy maker's willingness-to-pay (WTP) threshold. A value below this threshold is considered cost-effective and can be used as a component supporting new policies.

### Efficiency Frontier

The efficiency frontier plots the costs and QALYs of each intervention and connects interventions that provide the next best option in terms of costs and QALYs. Interventions not on the frontier are either dominated by other interventions (i.e., they have higher costs and lower QALYs than other interventions) or are excluded due to extended dominance (i.e., a more expensive intervention provides a lower ICER). The values listed adjacent to lines along the frontier represent the ICER of going from one intervention to the next and can be used to support policy makers decisions on optimal intervention strategies.

## **Probability of Creating a Secondary Tuberculosis Case Calculation**

We assumed that 85% of tuberculosis (TB) cases from our data source were due to reactivation of previously acquired latent TB infection (LTBI). To account for the remaining cases, we modeled the creation of secondary cases when a case of reactivation TB occurred. The formula based on this assumption is:

$$\text{Probability of Creating a Secondary Case} = \left( \frac{1}{0.85} \right) - 1 = 17.6\%$$

In this way, all TB cases are accounted for in this model and we minimize underestimation of overall longitudinal TB burden. Further to this, the method of modeling secondary cases will result in reductions in TB transmission as incidence of TB reactivation is reduced – in this way TB transmission was directly tied to incidence of TB reactivation.

## **Meta-Analysis of Reported Rates of Post-Arrival Reporting for Passive Follow-Up**

A meta-analysis was performed using Stata software, version 12.1 (StataCorp, www.stata.com). To complete this, logit-transformed proportions were meta-analyzed using random-effects. The weighted pooled point estimate was back transformed into a proportion for ease of interpretation (Appendix Figure 1). The result of this meta-analysis is that 68.4% (95% CI: 64.6% to 72.1%) of those referred for passive (unenforced) post-arrival follow-up actually attend the clinic post-arrival.

## **Additional Sensitivity Analysis**

### **Probabilistic Sensitivity Analysis**

Probabilistic sensitivity analysis (PSA) was performed to assess the uncertainty in parameters and their impact on decisions. To complete this, probabilistic distributions are created and sampled each replication. When detailed cost data was available and known to fall within well-defined ranges, costs were modeled with a triangular distribution; when cost data was more uncertain, a gamma distribution, which can accommodate skewed cost data, was used. Beta distributions were used for most probabilities. When literature data was available and exact proportions of persons experiencing an event could be calculated,  $\beta$  distributions parameters

were defined as:  $\alpha$  = number of persons experiencing event;  $\beta$  = number of persons not experiencing event. If this level of detail was not known, a  $\beta$  distribution was fit to represent reported 95% CI or means and standard deviations. In the case of treatment effect, lognormal distributions were used based on 2x2 tables of effectiveness or fit to our perceived level of uncertainty. For sampling health state utilities, we first sampled from the distribution of the healthy QALY. We assumed those with LTBI would have the same value. For TB and hospitalization QALYs, we sampled from distributions to decrement these QALYs based on the sampled healthy QALY.

The average results of the PSA are reported in Appendix Table 1. Variability can be seen through plots of the differences in costs and QALYs on a cost-effectiveness plane for the PSA of select strategies (Appendix Figure 2). The results of the PSA support the findings from the deterministic analysis: the intervention strategy of preimmigration interferon-gamma release assay (IGRA) screening coupled with postarrival follow-up and treatment with rifampin was the preferred strategy in migrants from moderate- to very high-incidence countries. Further analysis of the relationship between decisions is provided below in efficiency frontiers.

Efficiency frontiers are displayed in Appendix Figure 3. In each of the plotted frontiers, only one intervention was included on the frontier, with others excluded due to strict or extended dominance. Among migrants from low-incidence countries, only SEQ/RIF fell on the frontier, while among migrants from moderate high and very high-incidence countries, only IGRA/RIF fell on the frontier.

### **Exploratory Sensitivity Analysis**

Various exploratory sensitivity analyses were performed. We analyzed the impact of limiting LTBI screening by age on outcomes. We then analyzed the impact certain parameters may have on cost-effectiveness including: modeling low LTBI therapy uptake postarrival, ensuring 100% adherence in postarrival follow-up, ensuring 100% adherence and participation in all steps of the LTBI cascade of care, extending the time horizon, altering TB reactivation rate, and modeling high and low estimates of costs.

Parameter changes evaluated for exploratory sensitivity analysis are listed in Appendix Table 2. In the case of varying the reactivation rate, LTBI prevalence estimates were also adjusted to reflect the expected TB incidence based on data used to calibrate these parameters in

the base analysis. This would result in nearly identical number of overall TB cases over the time horizon, but costs due to increasing or decreasing LTBI prevalence will change.

Results of exploratory analyses are presented in Appendix Tables 3–6. Only screening certain portions of new migrants based on age did not significantly impact cost per QALY gained but did lessen the overall reductions in TB incidence seen. Mandating postarrival follow-up improved the reduction in TB incidence by 40% compared with a passive system. On the contrary, if we modeled initiation of LTBI therapy at an extreme low value of 63.5%, reduction in TB incidence was reduced by  $\approx 30\%$ . This further impacted decisions on which intervention strategy was likely to be the most cost-effective. Fully mandating all parts of the LTBI cascade of care (i.e., all those test-positive must follow-up postarrival and complete treatment, except in cases of adverse events) increased overall costs of intervention strategies  $\approx 40\%$ , but overall reductions in TB incidence exceeded 80%.

Using a lifetime time horizon significantly improved cost-effectiveness of intervention strategies. Adjusting reactivation rate or costs did not significantly impact cost-effectiveness but did impact the overall cost of intervention strategies. In the case of adjusting reactivation rate, this was due to increasing or decreasing the number of persons with LTBI.

**Appendix Table 1.** Average PSA results of implementing intervention strategies in various TB incidence settings

| Intervention                  | Cost/1,000, \$ | No. QALYs/1,000 | No. TB cases/1,000 | % Reduction in TB incidence | Cost/QALY gained, \$† |
|-------------------------------|----------------|-----------------|--------------------|-----------------------------|-----------------------|
| <b>Low TB incidence</b>       |                |                 |                    |                             |                       |
| Base case                     | 9,653          | 13,797.86       | 0.40               | NC                          | NC                    |
| SEQ/RIF                       | 60,425         | 13,798.51       | 0.27               | 33.76                       | 77,885                |
| SEQ/INH                       | 67,006         | 13,798.11       | 0.29               | 28.41                       | 228,858‡              |
| IGRA/RIF                      | 75,449         | 13,798.32       | 0.23               | 43.35                       | 143,563‡              |
| IGRA/INH                      | 86,579         | 13,798.19       | 0.25               | 37.03                       | 233,564‡              |
| TST/RIF                       | 121,260        | 13,798.08       | 0.25               | 38.07                       | 498,153‡              |
| TST/INH                       | 163,467        | 13,798.06       | 0.27               | 33.63                       | 751,114‡              |
| <b>Moderate TB incidence</b>  |                |                 |                    |                             |                       |
| Base case                     | 59,131         | 13,770.72       | 2.51               | NC                          | NC                    |
| SEQ/RIF                       | 121,736        | 13,771.95       | 1.62               | 35.45                       | 50,590§               |
| IGRA/RIF                      | 125,439        | 13,772.73       | 1.38               | 44.92                       | 32,938                |
| SEQ/INH                       | 142,037        | 13,772.33       | 1.72               | 31.53                       | 51,332‡               |
| IGRA/INH                      | 151,623        | 13,772.54       | 1.53               | 39.12                       | 50,769‡               |
| TST/RIF                       | 207,659        | 13,772.66       | 1.52               | 39.47                       | 76,512‡               |
| TST/INH                       | 281,239        | 13,772.58       | 1.64               | 34.53                       | 119,301‡              |
| <b>High TB incidence</b>      |                |                 |                    |                             |                       |
| Base case                     | 124,384        | 13,733.54       | 5.43               | NC                          | NC                    |
| SEQ/RIF                       | 195,166        | 13,737.25       | 3.52               | 35.16                       | 19,047§               |
| IGRA/RIF                      | 198,604        | 13,738.15       | 3.04               | 44.01                       | 16,093                |
| SEQ/INH                       | 232,435        | 13,736.49       | 3.76               | 30.82                       | 36,612‡               |
| IGRA/INH                      | 245,804        | 13,737.39       | 3.31               | 38.98                       | 31,501‡               |
| TST/RIF                       | 266,307        | 13,737.79       | 3.31               | 38.99                       | 33,343‡               |
| TST/INH                       | 352,574        | 13,737.35       | 3.58               | 34.05                       | 59,891‡               |
| <b>Very high TB incidence</b> |                |                 |                    |                             |                       |
| Base case                     | 184,977        | 13,696.10       | 8.13               | NC                          | NC                    |
| SEQ/RIF                       | 265,405        | 13,701.78       | 5.31               | 34.66                       | 14,163§               |

| Intervention | Cost/1,000, \$ | No. QALYs/1,000 | No. TB cases/1,000 | % Reduction in TB incidence | Cost/QALY gained, \$† |
|--------------|----------------|-----------------|--------------------|-----------------------------|-----------------------|
| IGRA/RIF     | 268,953        | 13,702.93       | 4.58               | 43.67                       | 12,299                |
| SEQ/INH      | 320,020        | 13,700.59       | 5.68               | 30.12                       | 30,062‡               |
| TST/RIF      | 322,422        | 13,702.09       | 5.00               | 38.48                       | 22,941‡               |
| IGRA/INH     | 337,776        | 13,701.61       | 5.03               | 38.12                       | 27,709‡               |
| TST/INH      | 420,458        | 13,701.09       | 5.39               | 33.70                       | 47,149‡               |

\*All costs in 2016 CAD. Dominated: This intervention strategy has higher costs and worse outcomes compared to the base case.

CI, confidence interval; IGRA, interferon-gamma release assay; INH, isoniazid; NC, not calculable; QALY, quality-adjusted life year; RIF, rifampin; SEQ, sequential screening; TB, tuberculosis; TST, tuberculin skin test.

Very high incidence,  $\geq 200$  cases per 100,000; high incidence:  $\geq 100$  and  $< 200$  cases/100,000; moderate incidence,  $\geq 30$  and  $< 100$  cases/100,000; low incidence:  $< 30$  cases/100,000.

†The cost per QALY gained is calculated in comparison to the base case.

‡This intervention strategy is strictly dominated by another intervention strategy. It is more expensive and has worse outcomes.

§This intervention strategy is extendedly dominated by another intervention strategy. While it increases QALYs, it has a higher ICER than a more expensive intervention strategy

**Appendix Table 2.** Parameter changes for the exploratory sensitivity analysis\*

| Parameter                           | Original estimate | Exploratory sensitivity analysis estimate(s), range |
|-------------------------------------|-------------------|-----------------------------------------------------|
| Full INH treatment                  | \$992             | \$804, \$1,179                                      |
| Full RIF treatment                  | \$575             | \$464, \$686                                        |
| Partial INH treatment               | \$462             | \$174, \$804                                        |
| Partial RIF treatment               | \$319             | \$178, \$464                                        |
| Complete TST                        | \$31              | \$24, \$38                                          |
| Incomplete TST                      | \$21              | \$17, \$25                                          |
| IGRA                                | \$54              | \$31, \$62                                          |
| Tuberculosis                        | \$20,532          | \$7,141, \$39,525                                   |
| LTBI adverse event                  | \$732             | \$549, \$916                                        |
| Hospitalization                     | \$6641            | \$5,305; \$9,985                                    |
| Death                               | \$26,933          | \$13,079; \$40,788                                  |
| Initiate treatment                  | 93.8%             | 100%                                                |
| Complete INH                        | 61.6%             | 100%                                                |
| Complete RIF                        | 81.4%             | 100%                                                |
| Annual reactivation rate†           | 0.11%             | 0.09%; 0.13%                                        |
| Time horizon                        | 25 y              | Lifetime                                            |
| Adherence to post-arrival follow-up | 68.4%             | 100%                                                |

\*All costs in 2016 Can \$. INH, isoniazid; IGRA, interferon-gamma release assay; LTBI, latent tuberculosis infection; RIF, rifampin; TST, tuberculin skin test.

†Also changes the prevalence of LTBI.

**Appendix Table 3.** Results of exploratory sensitivity analyses in TB screening in migrants from low TB incidence countries\*

| Intervention                           | Cost/1,000, \$ | No. QALYs/1,000 | No. TB cases/1,000 | % Reduction in TB incidence | Cost/QALY gained, \$† |
|----------------------------------------|----------------|-----------------|--------------------|-----------------------------|-----------------------|
| Only screen persons $\leq 60$ y of age |                |                 |                    |                             |                       |
| Base case                              | 9,681          | 13,761.03       | 0.41               | NC                          | NC                    |
| SEQ/RIF                                | 58,830         | 13,761.33       | 0.26               | 35.00                       | 166,639               |
| SEQ/INH                                | 65,133         | 13,761.11       | 0.29               | 28.20                       | 767,845‡              |
| IGRA/RIF                               | 77,220         | 13,761.25       | 0.23               | 44.02                       | 312,764‡              |
| IGRA/INH                               | 87,622         | 13,761.10       | 0.26               | 37.10                       | 1,243,726‡            |
| TST/RIF                                | 116,550        | 13,760.62       | 0.25               | 38.07                       | Dominated             |
| TST/INH                                | 156,102        | 13,760.67       | 0.27               | 33.35                       | Dominated             |
| Only screen persons $\leq 35$ y of age |                |                 |                    |                             |                       |
| Base case                              | 9,681          | 13,761.03       | 0.41               | NC                          | NC                    |
| SEQ/RIF                                | 45,484         | 13,761.34       | 0.34               | 16.46                       | 118,623               |
| SEQ/INH                                | 49,337         | 13,761.11       | 0.35               | 12.80                       | 501,351‡              |
| IGRA/RIF                               | 59,255         | 13,761.26       | 0.33               | 19.69                       | 222,482‡              |
| IGRA/INH                               | 66,138         | 13,761.10       | 0.34               | 15.84                       | 811,778‡              |
| TST/RIF                                | 89,077         | 13,760.62       | 0.35               | 14.71                       | Dominated             |
| TST/INH                                | 117,358        | 13,760.68       | 0.34               | 16.50                       | Dominated             |
| Only screen persons 10–60 y of age     |                |                 |                    |                             |                       |
| Base case                              | 9,681          | 13,761.03       | 0.41               | NC                          | NC                    |
| SEQ/RIF                                | 50,922         | 13,761.33       | 0.28               | 31.13                       | 138,216               |
| SEQ/INH                                | 55,929         | 13,761.11       | 0.29               | 29.15                       | 611,279‡              |
| IGRA/RIF                               | 66,222         | 13,761.25       | 0.24               | 39.86                       | 257,727‡              |
| IGRA/INH                               | 75,153         | 13,761.10       | 0.27               | 34.48                       | 990,386‡              |

| Intervention                              | Cost/1,000, \$ | No. QALYs/1,000 | No. TB cases/1,000 | % Reduction in TB incidence | Cost/QALY gained, \$† |
|-------------------------------------------|----------------|-----------------|--------------------|-----------------------------|-----------------------|
| TST/RIF                                   | 99,155         | 13,760.62       | 0.26               | 34.80                       | Dominated             |
| TST/INH                                   | 132,435        | 13,760.68       | 0.28               | 31.05                       | Dominated             |
| Only 63.5% initiate therapy after arrival |                |                 |                    |                             |                       |
| Base case                                 | 9,459          | 13,760.96       | 0.41               | NC                          | NC                    |
| SEQ/RIF                                   | 58,376         | 13,761.30       | 0.30               | 25.75                       | 143,147               |
| SEQ/INH                                   | 62,759         | 13,761.20       | 0.32               | 21.79                       | 224,620‡              |
| IGRA/RIF                                  | 75,049         | 13,761.22       | 0.28               | 32.26                       | 255,693‡              |
| IGRA/INH                                  | 82,340         | 13,761.16       | 0.29               | 27.98                       | 362,842‡              |
| TST/RIF                                   | 96,641         | 13,760.75       | 0.29               | 29.46                       | Dominated             |
| TST/INH                                   | 124,688        | 13,760.68       | 0.31               | 23.79                       | Dominated             |
| 100% Adherence to post-arrival follow-up  |                |                 |                    |                             |                       |
| Base case                                 | 9,937          | 13,761.12       | 0.40               | NC                          | NC                    |
| SEQ/RIF                                   | 65,283         | 13,761.84       | 0.19               | 52.25                       | 77,011                |
| SEQ/INH                                   | 74,688         | 13,761.48       | 0.23               | 44.11                       | 178,931‡              |
| IGRA/RIF                                  | 88,258         | 13,761.73       | 0.14               | 64.91                       | 129,787‡              |
| IGRA/INH                                  | 104,144        | 13,761.66       | 0.18               | 55.75                       | 176,541‡              |
| TST/RIF                                   | 158,280        | 13,761.05       | 0.17               | 58.17                       | Dominated             |
| TST/INH                                   | 218,474        | 13,761.03       | 0.20               | 50.85                       | Dominated             |
| No losses in the LTBI cascade of care     |                |                 |                    |                             |                       |
| Base case                                 | 10,173         | 13,761.32       | 0.39               | NC                          | NC                    |
| SEQ/RIF                                   | 65,488         | 13,762.28       | 0.15               | 60.59                       | 57,335                |
| SEQ/INH                                   | 79,499         | 13,762.13       | 0.17               | 57.04                       | 85,831‡               |
| IGRA/RIF                                  | 88,899         | 13,762.27       | 0.08               | 78.12                       | 82,958‡               |
| IGRA/INH                                  | 112,814        | 13,762.16       | 0.10               | 75.41                       | 122,324‡              |
| TST/RIF                                   | 164,894        | 13,762.19       | 0.12               | 68.64                       | 176,445‡              |
| TST/INH                                   | 258,857        | 13,762.15       | 0.13               | 65.48                       | 299,189‡              |
| Reactivation rate is 0.9 cases/1,000 PY   |                |                 |                    |                             |                       |
| Base case                                 | 9,709          | 13,760.03       | 0.41               | NC                          | NC                    |
| SEQ/RIF                                   | 61,978         | 13,760.30       | 0.25               | 38.35                       | 195,474               |
| SEQ/INH                                   | 68,898         | 13,760.08       | 0.28               | 31.52                       | 1,324,360‡            |
| IGRA/RIF                                  | 81,411         | 13,760.22       | 0.22               | 45.03                       | 380,575‡              |
| IGRA/INH                                  | 92,642         | 13,760.07       | 0.24               | 40.56                       | 2,359,934‡            |
| TST/RIF                                   | 121,635        | 13,759.59       | 0.24               | 40.74                       | Dominated             |
| TST/INH                                   | 163,310        | 13,759.64       | 0.27               | 35.05                       | Dominated             |
| Reactivation rate is 1.3 cases/1,000 PY   |                |                 |                    |                             |                       |
| Base case                                 | 9,533          | 13,761.67       | 0.40               | NC                          | NC                    |
| SEQ/RIF                                   | 60,332         | 13,761.94       | 0.26               | 35.38                       | 189,954‡              |
| SEQ/INH                                   | 66,632         | 13,761.72       | 0.29               | 27.67                       | 1,277,446‡            |
| IGRA/RIF                                  | 79,335         | 13,761.86       | 0.22               | 45.67                       | 370,447‡              |
| IGRA/INH                                  | 89,844         | 13,761.71       | 0.25               | 37.93                       | 2,285,044‡            |
| TST/RIF                                   | 120,192        | 13,761.23       | 0.24               | 41.31                       | Dominated             |
| TST/INH                                   | 161,282        | 13,761.28       | 0.26               | 34.15                       | Dominated             |
| Lifetime time horizon                     |                |                 |                    |                             |                       |
| Base case                                 | 13,375         | 20,735.49       | 0.57               | NC                          | NC                    |
| SEQ/RIF                                   | 63,180         | 20,735.79       | 0.35               | 38.24                       | 161,566§              |
| SEQ/INH                                   | 69,518         | 20,735.76       | 0.39               | 30.40                       | 203,916‡              |
| IGRA/RIF                                  | 82,257         | 20,736.47       | 0.32               | 44.05                       | 69,939                |
| IGRA/INH                                  | 93,122         | 20,735.95       | 0.35               | 37.45                       | 173,790‡              |
| TST/RIF                                   | 123,069        | 20,734.57       | 0.34               | 40.34                       | Dominated             |
| TST/INH                                   | 164,387        | 20,735.02       | 0.37               | 33.97                       | Dominated             |
| Minimum estimated costs                   |                |                 |                    |                             |                       |
| Base case                                 | 7,709          | 13,761.03       | 0.41               | NC                          | NC                    |
| SEQ/RIF                                   | 45,709         | 13,761.30       | 0.26               | 36.87                       | 142,099               |
| SEQ/INH                                   | 51,306         | 13,761.08       | 0.28               | 32.00                       | 975,411‡              |
| IGRA/RIF                                  | 52,694         | 13,761.22       | 0.22               | 46.16                       | 238,752‡              |
| IGRA/INH                                  | 62,376         | 13,761.07       | 0.25               | 39.07                       | 1,555,483‡            |
| TST/RIF                                   | 99,230         | 13,760.59       | 0.24               | 40.08                       | Dominated             |
| TST/INH                                   | 135,984        | 13,760.65       | 0.27               | 34.12                       | Dominated             |
| Maximum estimated costs                   |                |                 |                    |                             |                       |
| Base case                                 | 11,653         | 13,761.03       | 0.41               | NC                          | NC                    |
| SEQ/RIF                                   | 72,938         | 13,761.30       | 0.26               | 36.87                       | 229,171               |
| SEQ/INH                                   | 79,963         | 13,761.08       | 0.28               | 32.00                       | 1,528,335‡            |
| IGRA/RIF                                  | 92,536         | 13,761.22       | 0.22               | 46.16                       | 429,269‡              |
| IGRA/INH                                  | 104,750        | 13,761.07       | 0.25               | 39.07                       | 2,648,963‡            |
| TST/RIF                                   | 142,655        | 13,760.59       | 0.24               | 40.08                       | Dominated             |
| TST/INH                                   | 188,544        | 13,760.65       | 0.27               | 34.12                       | Dominated             |

| Intervention                                                                                                                                                                                                                                                                                                                         | Cost/1,000, \$ | No. QALYs/1,000 | No. TB cases/1,000 | % Reduction in TB incidence | Cost/QALY gained, \$† |
|--------------------------------------------------------------------------------------------------------------------------------------------------------------------------------------------------------------------------------------------------------------------------------------------------------------------------------------|----------------|-----------------|--------------------|-----------------------------|-----------------------|
| *All costs in 2016 Can \$. Dominated: This intervention strategy has higher costs and worse outcomes compared with the base case. IGRA, interferon-gamma release assay; INH, isoniazid; NC, not calculable; QALY, quality-adjusted life year; RIF, rifampin; SEQ, sequential screening; TB, tuberculosis; TST, tuberculin skin test. |                |                 |                    |                             |                       |
| †The cost per QALY gained is calculated in comparison to the base case.                                                                                                                                                                                                                                                              |                |                 |                    |                             |                       |
| ‡This intervention strategy is strictly dominated by another intervention strategy. It is more expensive and has worse outcomes.                                                                                                                                                                                                     |                |                 |                    |                             |                       |
| §This intervention strategy is extendedly dominated by another intervention strategy. While it increases QALYs, it has a higher ICER than a more expensive intervention strategy.                                                                                                                                                    |                |                 |                    |                             |                       |

**Appendix Table 4.** Results of exploratory sensitivity analyses in migrants from moderate TB incidence countries\*

| Intervention                              | Cost/1,000, \$ | No. QALYs/1,000 | No. TB cases/1,000 | % Reduction in TB incidence | Cost/QALY gained, \$† |
|-------------------------------------------|----------------|-----------------|--------------------|-----------------------------|-----------------------|
| Only screen persons ≤60 y of age          |                |                 |                    |                             |                       |
| Base case                                 | 58,301         | 13,735.03       | 2.47               | NC                          | NC                    |
| SEQ/RIF                                   | 118,834        | 13,736.66       | 1.64               | 33.66                       | 37,076‡               |
| IGRA/RIF                                  | 125,579        | 13,736.95       | 1.41               | 42.91                       | 34,924                |
| SEQ/INH                                   | 137,416        | 13,736.01       | 1.74               | 29.41                       | 80,574§               |
| IGRA/INH                                  | 149,533        | 13,736.94       | 1.56               | 36.67                       | 47,669§               |
| TST/RIF                                   | 199,887        | 13,737.13       | 1.54               | 37.55                       | 67,186§               |
| TST/INH                                   | 268,497        | 13,736.27       | 1.67               | 32.52                       | 168,567§              |
| Only screen persons ≤35 y of age          |                |                 |                    |                             |                       |
| Base case                                 | 58,301         | 13,735.03       | 2.47               | NC                          | NC                    |
| SEQ/RIF                                   | 98,543         | 13,736.30       | 2.09               | 15.25                       | 31,697‡               |
| IGRA/RIF                                  | 103,655        | 13,736.59       | 2.00               | 18.90                       | 29,012                |
| SEQ/INH                                   | 107,793        | 13,735.65       | 2.13               | 13.94                       | 79,979§               |
| IGRA/INH                                  | 116,023        | 13,736.58       | 2.07               | 16.28                       | 37,222§               |
| TST/RIF                                   | 159,486        | 13,736.77       | 2.04               | 17.56                       | 58,010§               |
| TST/INH                                   | 206,294        | 13,735.91       | 2.11               | 14.55                       | 167,437§              |
| Only screen persons 10–60 y of age        |                |                 |                    |                             |                       |
| Base case                                 | 58,301         | 13,735.03       | 2.47               | NC                          | NC                    |
| SEQ/RIF                                   | 108,704        | 13,736.57       | 1.68               | 31.89                       | 32,638‡               |
| IGRA/RIF                                  | 114,669        | 13,736.88       | 1.49               | 39.59                       | 30,343                |
| SEQ/INH                                   | 125,466        | 13,735.94       | 1.79               | 27.63                       | 73,548§               |
| IGRA/INH                                  | 135,916        | 13,736.87       | 1.63               | 34.05                       | 42,064§               |
| TST/RIF                                   | 176,404        | 13,737.07       | 1.59               | 35.78                       | 57,931§               |
| TST/INH                                   | 235,861        | 13,736.21       | 1.75               | 29.27                       | 150,695§              |
| Only 63.5% initiate therapy after arrival |                |                 |                    |                             |                       |
| Base case                                 | 58,301         | 13,734.92       | 2.50               | NC                          | NC                    |
| SEQ/RIF                                   | 117,154        | 13,736.00       | 1.84               | 26.33                       | 54,608‡               |
| IGRA/RIF                                  | 123,323        | 13,736.33       | 1.70               | 32.08                       | 46,250                |
| SEQ/INH                                   | 130,963        | 13,735.79       | 1.93               | 22.58                       | 83,767§               |
| IGRA/INH                                  | 140,730        | 13,736.09       | 1.81               | 27.61                       | 70,514§               |
| TST/RIF                                   | 170,321        | 13,736.57       | 1.78               | 28.69                       | 67,777§               |
| TST/INH                                   | 218,771        | 13,736.42       | 1.87               | 25.25                       | 107,079§              |
| 100% Adherence to post-arrival follow-up  |                |                 |                    |                             |                       |
| Base case                                 | 58,301         | 13,734.93       | 2.45               | NC                          | NC                    |
| SEQ/RIF                                   | 130,209        | 13,737.12       | 1.18               | 51.75                       | 32,935‡               |
| IGRA/RIF                                  | 139,318        | 13,738.23       | 0.83               | 66.10                       | 24,577                |
| SEQ/INH                                   | 159,527        | 13,736.93       | 1.36               | 44.67                       | 50,690§               |
| IGRA/INH                                  | 177,134        | 13,737.59       | 1.09               | 55.63                       | 44,712§               |
| TST/RIF                                   | 262,181        | 13,737.91       | 1.02               | 58.50                       | 68,474§               |
| TST/INH                                   | 367,557        | 13,737.10       | 1.23               | 49.65                       | 142,888§              |
| No losses in the LTBI cascade of care     |                |                 |                    |                             |                       |
| Base case                                 | 60,621         | 13,735.17       | 2.33               | NC                          | NC                    |
| SEQ/RIF                                   | 127,849        | 13,737.68       | 0.92               | 60.38                       | 26,863‡               |
| IGRA/RIF                                  | 136,690        | 13,738.68       | 0.52               | 77.51                       | 21,717                |
| SEQ/INH                                   | 169,175        | 13,737.77       | 0.98               | 57.87                       | 41,819§               |
| IGRA/INH                                  | 188,938        | 13,738.41       | 0.60               | 74.47                       | 39,639§               |
| TST/RIF                                   | 269,509        | 13,738.19       | 0.76               | 67.35                       | 69,219§               |
| TST/INH                                   | 429,117        | 13,737.59       | 0.81               | 65.19                       | 152,307§              |
| Reactivation rate is 0.9 cases/1,000 PY   |                |                 |                    |                             |                       |
| Base case                                 | 59,005         | 13,729.18       | 2.50               | NC                          | NC                    |
| SEQ/RIF                                   | 127,864        | 13,730.85       | 1.57               | 37.06                       | 41,217‡               |
| IGRA/RIF                                  | 135,775        | 13,731.33       | 1.34               | 46.46                       | 35,627                |
| SEQ/INH                                   | 150,721        | 13,730.75       | 1.71               | 31.77                       | 58,282§               |
| IGRA/INH                                  | 164,567        | 13,731.44       | 1.50               | 40.17                       | 46,683§               |

| Intervention                            | Cost/1,000, \$ | No. QALYs/1,000 | No. TB cases/1,000 | % Reduction in TB incidence | Cost/QALY gained, \$† |
|-----------------------------------------|----------------|-----------------|--------------------|-----------------------------|-----------------------|
| TST/RIF                                 | 209,711        | 13,731.83       | 1.47               | 41.11                       | 56,717\$              |
| TST/INH                                 | 283,226        | 13,731.15       | 1.62               | 35.31                       | 113,602\$             |
| Reactivation rate is 1.3 cases/1,000 PY |                |                 |                    |                             |                       |
| Base case                               | 57,807         | 13,738.64       | 2.45               | NC                          | NC                    |
| SEQ/RIF                                 | 117,950        | 13,741.03       | 1.56               | 36.30                       | 25,192‡               |
| IGRA/RIF                                | 124,326        | 13,741.33       | 1.33               | 45.98                       | 24,716                |
| SEQ/INH                                 | 136,278        | 13,740.49       | 1.68               | 31.34                       | 42,500\$              |
| IGRA/INH                                | 147,736        | 13,740.48       | 1.49               | 39.45                       | 48,846\$              |
| TST/RIF                                 | 203,596        | 13,740.95       | 1.46               | 40.40                       | 63,063\$              |
| TST/INH                                 | 274,258        | 13,740.54       | 1.60               | 34.62                       | 114,013\$             |
| Lifetime time horizon                   |                |                 |                    |                             |                       |
| Base case                               | 80,521         | 20,589.15       | 3.42               | NC                          | NC                    |
| SEQ/RIF                                 | 135,403        | 20,591.19       | 2.21               | 35.31                       | 26,834‡               |
| IGRA/RIF                                | 141,253        | 20,592.00       | 2.42               | 29.17                       | 21,301                |
| SEQ/INH                                 | 155,841        | 20,591.14       | 1.89               | 44.81                       | 37,751\$              |
| IGRA/INH                                | 166,455        | 20,591.74       | 2.11               | 38.38                       | 33,183\$              |
| TST/RIF                                 | 219,818        | 20,591.06       | 2.07               | 39.51                       | 72,744\$              |
| TST/INH                                 | 291,198        | 20,590.12       | 2.26               | 33.75                       | 215,855\$             |
| Minimum estimated costs                 |                |                 |                    |                             |                       |
| Base case                               | 46,426         | 13,735.03       | 2.47               | NC                          | NC                    |
| IGRA/RIF                                | 92,622         | 13,736.66       | 1.33               | 46.36                       | 28,307                |
| SEQ/RIF                                 | 93,356         | 13,736.36       | 1.57               | 36.52                       | 35,068\$              |
| SEQ/INH                                 | 111,521        | 13,735.71       | 1.72               | 30.55                       | 94,686\$              |
| IGRA/INH                                | 115,204        | 13,736.65       | 1.50               | 39.47                       | 42,470\$              |
| TST/RIF                                 | 169,528        | 13,736.84       | 1.46               | 40.77                       | 67,901\$              |
| TST/INH                                 | 233,240        | 13,735.98       | 1.61               | 34.88                       | 196,119\$             |
| Maximum estimated costs                 |                |                 |                    |                             |                       |
| Base case                               | 70,178         | 13,735.03       | 2.47               | NC                          | NC                    |
| SEQ/RIF                                 | 144,900        | 13,736.36       | 1.57               | 36.52                       | 55,836‡               |
| IGRA/RIF                                | 150,482        | 13,736.66       | 1.33               | 46.36                       | 49,206                |
| SEQ/INH                                 | 168,312        | 13,735.71       | 1.72               | 30.55                       | 142,743               |
| IGRA/INH                                | 179,434        | 13,736.65       | 1.50               | 39.47                       | 67,465\$              |
| TST/RIF                                 | 242,876        | 13,736.84       | 1.46               | 40.77                       | 95,258\$              |
| TST/INH                                 | 322,868        | 13,735.98       | 1.61               | 34.88                       | 265,276\$             |

\*All costs in 2016 Can \$. IGRA, interferon-gamma release assay; INH, isoniazid; NC, not calculable; QALY, quality-adjusted life year; RIF, rifampin; SEQ, sequential screening; TB, tuberculosis; TST, tuberculin skin test.

†The cost per QALY gained is calculated in comparison to the base case.

‡This intervention strategy is extendedly dominated by another intervention strategy. While it increases QALYs, it has a higher ICER than a more expensive intervention strategy.

§This intervention strategy is strictly dominated by another intervention strategy. It is more expensive and has worse outcomes.

**Appendix Table 5.** Results of exploratory sensitivity analyses in migrants from high TB incidence countries\*

| Intervention                       | Cost/1,000, \$ | No. QALYs/1,000 | No. TB cases/1,000 | % Reduction in TB incidence | Cost/QALY gained, (\$)† |
|------------------------------------|----------------|-----------------|--------------------|-----------------------------|-------------------------|
| Only screen persons ≤60 y of age   |                |                 |                    |                             |                         |
| Base case                          | 122,928        | 13,702.56       | 5.39               | NC                          | NC                      |
| SEQ/RIF                            | 189,766        | 13,703.94       | 3.57               | 33.80                       | 48,452‡                 |
| IGRA/RIF                           | 195,130        | 13,705.08       | 3.08               | 42.80                       | 28,627                  |
| SEQ/INH                            | 223,538        | 13,703.44       | 3.80               | 29.51                       | 113,251\$               |
| IGRA/INH                           | 239,543        | 13,704.43       | 3.43               | 36.35                       | 62,167\$                |
| TST/RIF                            | 256,075        | 13,705.02       | 3.34               | 38.07                       | 54,092*                 |
| TST/INH                            | 336,983        | 13,704.39       | 3.66               | 32.05                       | 117,017\$               |
| Only screen persons ≤35 y of age   |                |                 |                    |                             |                         |
| Base case                          | 122,928        | 13,702.56       | 5.39               | NC                          | NC                      |
| SEQ/RIF                            | 162,376        | 13,703.32       | 4.56               | 15.42                       | 51,575‡                 |
| IGRA/RIF                           | 166,890        | 13,703.57       | 4.36               | 19.13                       | 43,327                  |
| SEQ/INH                            | 177,765        | 13,703.19       | 4.64               | 13.78                       | 86,006\$                |
| IGRA/INH                           | 186,811        | 13,703.28       | 4.49               | 16.73                       | 88,102\$                |
| TST/RIF                            | 213,873        | 13,703.41       | 4.44               | 17.59                       | 107,073\$               |
| TST/INH                            | 263,567        | 13,703.20       | 4.60               | 14.65                       | 219,339\$               |
| Only screen persons 10–60 y of age |                |                 |                    |                             |                         |
| Base case                          | 122,928        | 13,702.56       | 5.39               | NC                          | NC                      |
| SEQ/RIF                            | 179,377        | 13,704.28       | 3.70               | 31.33                       | 32,716‡                 |
| IGRA/RIF                           | 183,730        | 13,705.06       | 3.24               | 39.78                       | 24,321                  |
| SEQ/INH                            | 210,766        | 13,703.81       | 3.94               | 26.87                       | 70,087\$                |

| Intervention                              | Cost/1,000, \$ | No. QALYs/1,000 | No. TB cases/1,000 | % Reduction in TB incidence | Cost/QALY gained, (\$)+ |
|-------------------------------------------|----------------|-----------------|--------------------|-----------------------------|-------------------------|
| IGRA/INH                                  | 223,488        | 13,704.55       | 3.56               | 33.89                       | 50,319\$                |
| TST/RIF                                   | 235,007        | 13,704.25       | 3.50               | 34.96                       | 66,195\$                |
| TST/INH                                   | 304,261        | 13,704.11       | 3.77               | 30.10                       | 116,849\$               |
| Only 63.5% initiate therapy after arrival |                |                 |                    |                             |                         |
| Base case                                 | 123,493        | 13,701.90       | 5.46               | NC                          | NC                      |
| SEQ/RIF                                   | 187,956        | 13,703.54       | 4.02               | 26.37                       | 39,248                  |
| IGRA/RIF                                  | 192,897        | 13,703.54       | 3.70               | 32.24                       | 42,170                  |
| SEQ/INH                                   | 213,393        | 13,703.21       | 4.22               | 22.66                       | 68,782\$                |
| IGRA/INH                                  | 224,618        | 13,703.45       | 3.93               | 28.10                       | 65,044\$                |
| TST/RIF                                   | 230,606        | 13,703.38       | 3.91               | 28.37                       | 72,197\$                |
| TST/INH                                   | 287,689        | 13,703.11       | 4.12               | 24.65                       | 135,974\$               |
| 100% adherence to post-arrival follow-up  |                |                 |                    |                             |                         |
| Base case                                 | 123,590        | 13,701.71       | 5.32               | NC                          | NC                      |
| SEQ/RIF                                   | 205,198        | 13,705.26       | 2.57               | 51.59                       | 22,981‡                 |
| IGRA/RIF                                  | 213,881        | 13,706.71       | 1.82               | 65.71                       | 18,066                  |
| SEQ/INH                                   | 260,097        | 13,704.83       | 3.01               | 43.49                       | 43,784\$                |
| IGRA/INH                                  | 283,398        | 13,705.64       | 2.35               | 55.82                       | 40,719\$                |
| TST/RIF                                   | 316,894        | 13,706.31       | 2.24               | 57.87                       | 42,089\$                |
| TST/INH                                   | 441,135        | 13,705.29       | 2.71               | 49.10                       | 88,850\$                |
| No losses in the LTBI cascade of care     |                |                 |                    |                             |                         |
| Base case                                 | 123,337        | 13,702.66       | 5.13               | NC                          | NC                      |
| SEQ/RIF                                   | 199,723        | 13,706.07       | 2.05               | 59.95                       | 22,403‡                 |
| IGRA/RIF                                  | 206,838        | 13,707.94       | 1.16               | 77.37                       | 15,795                  |
| SEQ/INH                                   | 274,295        | 13,705.94       | 2.19               | 57.32                       | 45,942\$                |
| IGRA/INH                                  | 301,381        | 13,706.97       | 1.32               | 74.20                       | 41,269\$                |
| TST/RIF                                   | 318,782        | 13,706.36       | 1.66               | 67.68                       | 52,776\$                |
| TST/INH                                   | 501,470        | 13,705.89       | 1.80               | 64.93                       | 116,949\$               |
| Reactivation rate is 0.9 cases/1,000 PY   |                |                 |                    |                             |                         |
| Base case                                 | 123,878        | 13,689.10       | 5.42               | NC                          | NC                      |
| SEQ/RIF                                   | 207,013        | 13,692.31       | 3.44               | 36.44                       | 25,889‡                 |
| IGRA/RIF                                  | 215,001        | 13,692.95       | 2.93               | 45.93                       | 23,645                  |
| SEQ/INH                                   | 249,627        | 13,691.78       | 3.72               | 31.35                       | 46,868\$                |
| IGRA/INH                                  | 269,077        | 13,691.92       | 3.26               | 39.73                       | 51,459\$                |
| TST/RIF                                   | 271,148        | 13,692.32       | 3.21               | 40.72                       | 45,759\$                |
| TST/INH                                   | 359,562        | 13,691.89       | 3.51               | 35.11                       | 84,512\$                |
| Reactivation rate is 1.3 cases/1,000 PY   |                |                 |                    |                             |                         |
| Base case                                 | 122,759        | 13,710.67       | 5.38               | NC                          | NC                      |
| SEQ/RIF                                   | 185,440        | 13,713.34       | 3.43               | 36.21                       | 23,481‡                 |
| IGRA/RIF                                  | 190,194        | 13,713.62       | 2.92               | 45.75                       | 22,844                  |
| SEQ/INH                                   | 218,459        | 13,712.71       | 3.69               | 31.42                       | 47,077\$                |
| IGRA/INH                                  | 232,647        | 13,713.21       | 3.28               | 39.10                       | 43,315\$                |
| TST/RIF                                   | 257,754        | 13,713.51       | 3.20               | 40.65                       | 47,589\$                |
| TST/INH                                   | 340,390        | 13,713.27       | 3.52               | 34.57                       | 83,627\$                |
| Lifetime time horizon                     |                |                 |                    |                             |                         |
| Base case                                 | 170,849        | 20,402.30       | 7.49               | NC                          | NC                      |
| SEQ/RIF                                   | 224,283        | 20,407.15       | 4.82               | 35.70                       | 11,020‡                 |
| IGRA/RIF                                  | 225,833        | 20,408.27       | 4.06               | 45.77                       | 9,210                   |
| SEQ/INH                                   | 261,944        | 20,405.53       | 5.24               | 30.06                       | 28,166\$                |
| TST/RIF                                   | 275,189        | 20,405.94       | 4.61               | 38.44                       | 28,678\$                |
| IGRA/INH                                  | 291,260        | 20,406.55       | 4.51               | 39.84                       | 28,311\$                |
| TST/INH                                   | 377,756        | 20,404.24       | 4.97               | 33.69                       | 106,493\$               |
| Minimum estimated costs                   |                |                 |                    |                             |                         |
| Base case                                 | 97,691         | 13,702.56       | 5.39               | NC                          | NC                      |
| IGRA/RIF                                  | 150,526        | 13,705.48       | 2.91               | 45.99                       | 18,093                  |
| SEQ/RIF                                   | 151,483        | 13,704.93       | 3.44               | 36.06                       | 22,612\$                |
| SEQ/INH                                   | 184,273        | 13,704.38       | 3.73               | 30.73                       | 47,426\$                |
| IGRA/INH                                  | 192,125        | 13,704.35       | 3.28               | 39.21                       | 52,631\$                |
| TST/RIF                                   | 215,987        | 13,704.93       | 3.22               | 40.18                       | 49,754\$                |
| TST/INH                                   | 291,076        | 13,704.15       | 3.54               | 34.36                       | 121,070\$               |
| Maximum estimated costs                   |                |                 |                    |                             |                         |
| Base case                                 | 148,167        | 13,702.56       | 5.39               | NC                          | NC                      |
| SEQ/RIF                                   | 230,715        | 13,704.93       | 3.44               | 36.06                       | 34,699‡                 |
| IGRA/RIF                                  | 234,294        | 13,705.48       | 2.91               | 45.99                       | 29,493                  |
| SEQ/INH                                   | 273,020        | 13,704.38       | 3.73               | 30.73                       | 68,389\$                |
| IGRA/INH                                  | 287,910        | 13,704.35       | 3.28               | 39.21                       | 77,883\$                |
| TST/RIF                                   | 311,276        | 13,704.93       | 3.22               | 40.18                       | 68,602\$                |
| TST/INH                                   | 406,415        | 13,704.15       | 3.54               | 34.36                       | 161,677\$               |

| Intervention                                                                                                                                                                                                                  | Cost/1,000, \$ | No. QALYs/1,000 | No. TB cases/1,000 | % Reduction in TB incidence | Cost/QALY gained, (\$) <sup>†</sup> |
|-------------------------------------------------------------------------------------------------------------------------------------------------------------------------------------------------------------------------------|----------------|-----------------|--------------------|-----------------------------|-------------------------------------|
| *All costs in 2016 Can \$. IGRA, interferon-gamma release assay; INH, isoniazid; NC, not calculable; QALY, quality-adjusted life year; RIF, rifampin; SEQ, sequential screening; TB, tuberculosis; TST, tuberculin skin test. |                |                 |                    |                             |                                     |
| <sup>†</sup> The cost per QALY gained is calculated in comparison to the base case.                                                                                                                                           |                |                 |                    |                             |                                     |
| <sup>‡</sup> This intervention strategy is extendedly dominated by another intervention strategy. While it increases QALYs, it has a higher ICER than a more expensive intervention strategy.                                 |                |                 |                    |                             |                                     |
| <sup>§</sup> This intervention strategy is strictly dominated by another intervention strategy. It is more expensive and has worse outcomes.                                                                                  |                |                 |                    |                             |                                     |

**Appendix Table 6.** Results of exploratory analyses in migrants from very high TB incidence countries\*

| Intervention                              | Cost/1,000, \$ | No. QALYs/1,000 | No. TB cases/1,000 | % Reduction in TB incidence | Cost/QALY gained, \$ <sup>†</sup> |
|-------------------------------------------|----------------|-----------------|--------------------|-----------------------------|-----------------------------------|
| Only screen persons ≤60 y of age          |                |                 |                    |                             |                                   |
| Base case                                 | 184,357        | 13,666.32       | 8.12               | NC                          | NC                                |
| SEQ/RIF                                   | 257,138        | 13,670.07       | 5.36               | 33.99                       | 19,422 <sup>‡</sup>               |
| IGRA/RIF                                  | 262,010        | 13,671.02       | 4.64               | 42.77                       | 16,507                            |
| SEQ/INH                                   | 307,723        | 13,669.52       | 5.78               | 28.79                       | 38,514 <sup>§</sup>               |
| TST/RIF                                   | 310,389        | 13,670.59       | 5.05               | 37.82                       | 29,494 <sup>§</sup>               |
| IGRA/INH                                  | 325,585        | 13,669.95       | 5.16               | 36.45                       | 38,909 <sup>§</sup>               |
| TST/INH                                   | 402,151        | 13,669.61       | 5.52               | 32.05                       | 66,187 <sup>§</sup>               |
| Only screen persons ≤35 y of age          |                |                 |                    |                             |                                   |
| Base case                                 | 184,357        | 13,666.32       | 8.12               | NC                          | NC                                |
| SEQ/RIF                                   | 223,125        | 13,668.52       | 6.89               | 15.08                       | 17,593 <sup>‡</sup>               |
| IGRA/RIF                                  | 226,103        | 13,668.80       | 6.55               | 19.29                       | 16,848                            |
| SEQ/INH                                   | 244,909        | 13,667.52       | 7.03               | 13.44                       | 50,260 <sup>§</sup>               |
| IGRA/INH                                  | 255,309        | 13,668.30       | 6.80               | 16.28                       | 35,749 <sup>§</sup>               |
| TST/RIF                                   | 265,651        | 13,668.53       | 6.74               | 16.94                       | 36,847 <sup>§</sup>               |
| TST/INH                                   | 316,918        | 13,667.99       | 6.92               | 14.77                       | 79,512 <sup>§</sup>               |
| Only screen persons 10–60 y of age        |                |                 |                    |                             |                                   |
| Base case                                 | 184,357        | 13,666.32       | 8.12               | NC                          | NC                                |
| SEQ/RIF                                   | 246,752        | 13,670.05       | 5.57               | 31.33                       | 16,711 <sup>‡</sup>               |
| IGRA/RIF                                  | 250,991        | 13,671.01       | 4.93               | 39.31                       | 14,206                            |
| TST/RIF                                   | 290,406        | 13,670.58       | 5.28               | 34.94                       | 24,898 <sup>§</sup>               |
| SEQ/INH                                   | 292,011        | 13,669.51       | 5.94               | 26.85                       | 33,753 <sup>§</sup>               |
| IGRA/INH                                  | 307,714        | 13,669.93       | 5.35               | 34.05                       | 34,114 <sup>§</sup>               |
| TST/INH                                   | 370,423        | 13,669.60       | 5.65               | 30.38                       | 56,781 <sup>§</sup>               |
| Only 63.5% initiate therapy after arrival |                |                 |                    |                             |                                   |
| Base case                                 | 183,165        | 13,667.06       | 8.14               | NC                          | NC                                |
| SEQ/RIF                                   | 255,496        | 13,669.71       | 6.08               | 25.22                       | 27,222 <sup>‡</sup>               |
| IGRA/RIF                                  | 260,008        | 13,670.45       | 5.61               | 31.07                       | 22,661                            |
| TST/RIF                                   | 286,279        | 13,669.35       | 5.85               | 28.10                       | 44,932 <sup>§</sup>               |
| SEQ/INH                                   | 291,905        | 13,669.14       | 6.36               | 21.85                       | 52,130 <sup>§</sup>               |
| IGRA/INH                                  | 305,683        | 13,669.01       | 5.94               | 26.93                       | 62,670 <sup>§</sup>               |
| TST/INH                                   | 352,634        | 13,669.30       | 6.19               | 23.92                       | 75,655 <sup>§</sup>               |
| 100% Adherence to post-arrival follow-up  |                |                 |                    |                             |                                   |
| Base case                                 | 185,064        | 13,667.21       | 8.01               | NC                          | NC                                |
| SEQ/RIF                                   | 277,526        | 13,672.40       | 3.86               | 51.83                       | 17,814 <sup>‡</sup>               |
| IGRA/RIF                                  | 286,742        | 13,673.59       | 2.75               | 65.72                       | 15,931                            |
| SEQ/INH                                   | 356,943        | 13,671.03       | 4.50               | 43.88                       | 45,057 <sup>§</sup>               |
| TST/RIF                                   | 369,167        | 13,673.42       | 3.36               | 58.09                       | 29,667 <sup>§</sup>               |
| IGRA/INH                                  | 386,849        | 13,672.66       | 3.53               | 56.00                       | 37,031 <sup>§</sup>               |
| TST/INH                                   | 512,140        | 13,672.17       | 4.08               | 49.11                       | 65,978 <sup>§</sup>               |
| No losses in the LTBI cascade of care     |                |                 |                    |                             |                                   |
| Base case                                 | 184,268        | 13,668.16       | 7.73               | NC                          | NC                                |
| SEQ/RIF                                   | 269,103        | 13,674.32       | 3.10               | 59.97                       | 13,783 <sup>‡</sup>               |
| IGRA/RIF                                  | 275,614        | 13,675.78       | 1.75               | 77.33                       | 11,997                            |
| TST/RIF                                   | 366,839        | 13,675.63       | 2.52               | 67.46                       | 24,447 <sup>§</sup>               |
| SEQ/INH                                   | 376,306        | 13,674.18       | 3.27               | 57.66                       | 31,918 <sup>§</sup>               |
| IGRA/INH                                  | 411,237        | 13,675.57       | 1.97               | 74.47                       | 30,634 <sup>§</sup>               |
| TST/INH                                   | 571,667        | 13,674.53       | 2.71               | 65.00                       | 60,899 <sup>§</sup>               |
| Reactivation rate is 0.9 cases/1,000 PY   |                |                 |                    |                             |                                   |
| Base case                                 | 185,203        | 13,646.81       | 8.14               | NC                          | NC                                |
| SEQ/RIF                                   | 283,301        | 13,651.14       | 5.19               | 36.26                       | 22,626 <sup>‡</sup>               |
| IGRA/RIF                                  | 291,983        | 13,651.90       | 4.43               | 45.51                       | 20,962                            |
| TST/RIF                                   | 330,139        | 13,651.84       | 4.85               | 40.39                       | 28,775 <sup>§</sup>               |
| SEQ/INH                                   | 346,376        | 13,650.64       | 5.63               | 30.82                       | 42,038 <sup>§</sup>               |
| IGRA/INH                                  | 370,889        | 13,651.29       | 4.96               | 39.11                       | 41,386 <sup>§</sup>               |
| TST/INH                                   | 433,739        | 13,651.04       | 5.34               | 34.41                       | 58,669 <sup>§</sup>               |
| Reactivation rate is 1.3 cases/1,000 PY   |                |                 |                    |                             |                                   |
| Base case                                 | 181,988        | 13,680.54       | 8.02               | NC                          | NC                                |

| Intervention            | Cost/1,000, \$ | No. QALYs/1,000 | No. TB cases/1,000 | % Reduction in TB incidence | Cost/QALY gained, \$† |
|-------------------------|----------------|-----------------|--------------------|-----------------------------|-----------------------|
| SEQ/RIF                 | 250,392        | 13,684.51       | 5.19               | 35.28                       | 17,215‡               |
| IGRA/RIF                | 252,612        | 13,684.78       | 4.39               | 45.28                       | 16,672                |
| SEQ/INH                 | 297,483        | 13,682.75       | 5.57               | 30.53                       | 52,289§               |
| TST/RIF                 | 309,989        | 13,684.00       | 4.84               | 39.65                       | 36,943§               |
| IGRA/INH                | 313,436        | 13,683.69       | 4.91               | 38.75                       | 41,738§               |
| TST/INH                 | 403,690        | 13,683.21       | 5.32               | 33.63                       | 83,081§               |
| Lifetime time horizon   |                |                 |                    |                             |                       |
| Base case               | 257,337        | 20,201.68       | 11.34              | NC                          | NC                    |
| SEQ/RIF                 | 309,830        | 20,208.76       | 7.29               | 35.77                       | 7,415‡                |
| IGRA/RIF                | 309,977        | 20,212.11       | 6.23               | 45.09                       | 5,046                 |
| TST/RIF                 | 362,091        | 20,207.77       | 7.90               | 30.38                       | 17,210§               |
| SEQ/INH                 | 364,532        | 20,208.76       | 6.84               | 39.70                       | 15,141§               |
| IGRA/INH                | 378,284        | 20,208.92       | 7.00               | 38.33                       | 16,718§               |
| TST/INH                 | 459,696        | 20,207.51       | 7.48               | 34.03                       | 34,692§               |
| Minimum estimated costs |                |                 |                    |                             |                       |
| Base case               | 146,557        | 13,666.32       | 8.12               | NC                          | NC                    |
| IGRA/RIF                | 206,883        | 13,671.50       | 4.41               | 45.61                       | 11,632                |
| SEQ/RIF                 | 207,111        | 13,670.25       | 5.18               | 36.23                       | 15,404§               |
| SEQ/INH                 | 254,658        | 13,670.32       | 5.62               | 30.76                       | 27,013§               |
| TST/RIF                 | 260,362        | 13,671.23       | 4.86               | 40.16                       | 23,169§               |
| IGRA/INH                | 267,040        | 13,671.02       | 4.97               | 38.82                       | 25,656§               |
| TST/INH                 | 346,126        | 13,669.91       | 5.33               | 34.34                       | 55,593§               |
| Maximum estimated costs |                |                 |                    |                             |                       |
| Base case               | 222,159        | 13,666.32       | 8.12               | NC                          | NC                    |
| SEQ/RIF                 | 313,033        | 13,670.25       | 5.18               | 36.23                       | 23,117‡               |
| IGRA/RIF                | 315,886        | 13,671.50       | 4.41               | 45.61                       | 18,073                |
| SEQ/INH                 | 374,284        | 13,670.32       | 5.62               | 30.76                       | 38,015§               |
| TST/RIF                 | 376,642        | 13,671.23       | 4.86               | 40.16                       | 31,450§               |
| IGRA/INH                | 393,477        | 13,671.02       | 4.97               | 38.82                       | 36,481§               |
| TST/INH                 | 485,765        | 13,669.91       | 5.33               | 34.34                       | 73,432§               |

\*All costs in 2016 Can \$. IGRA, interferon-gamma release assay; INH, isoniazid; NC, not calculable; QALY, quality-adjusted life year; RIF, rifampin; SEQ, sequential screening; TB, tuberculosis; TST, tuberculin skin test.

†The cost per QALY gained is calculated in comparison to the base case.

‡This intervention strategy is extendedly dominated by another intervention strategy. While it increases QALYs, it has a higher ICER than a more expensive intervention strategy.

§This intervention strategy is strictly dominated by another intervention strategy. It is more expensive and has worse outcomes.

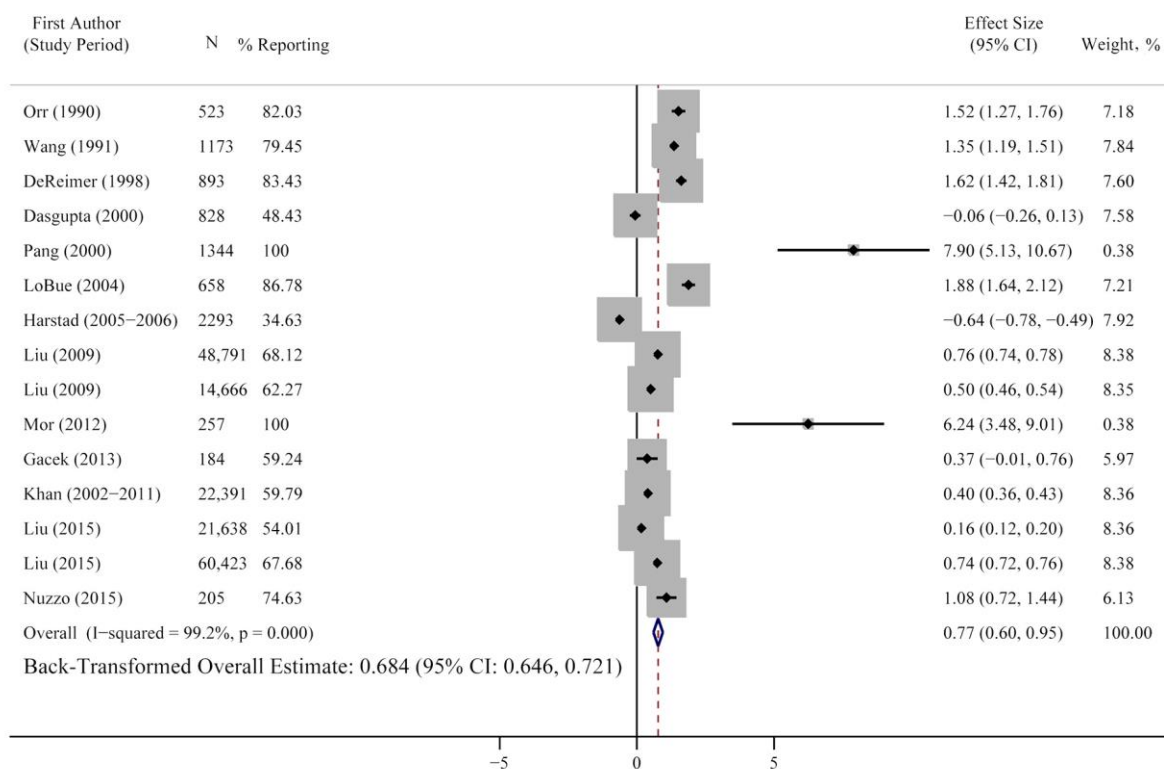

**Appendix Figure 1.** Meta-analysis of adherence with a request for post-arrival follow-up. This was used to inform the proportion who report for LTBI treatment post-arrival.

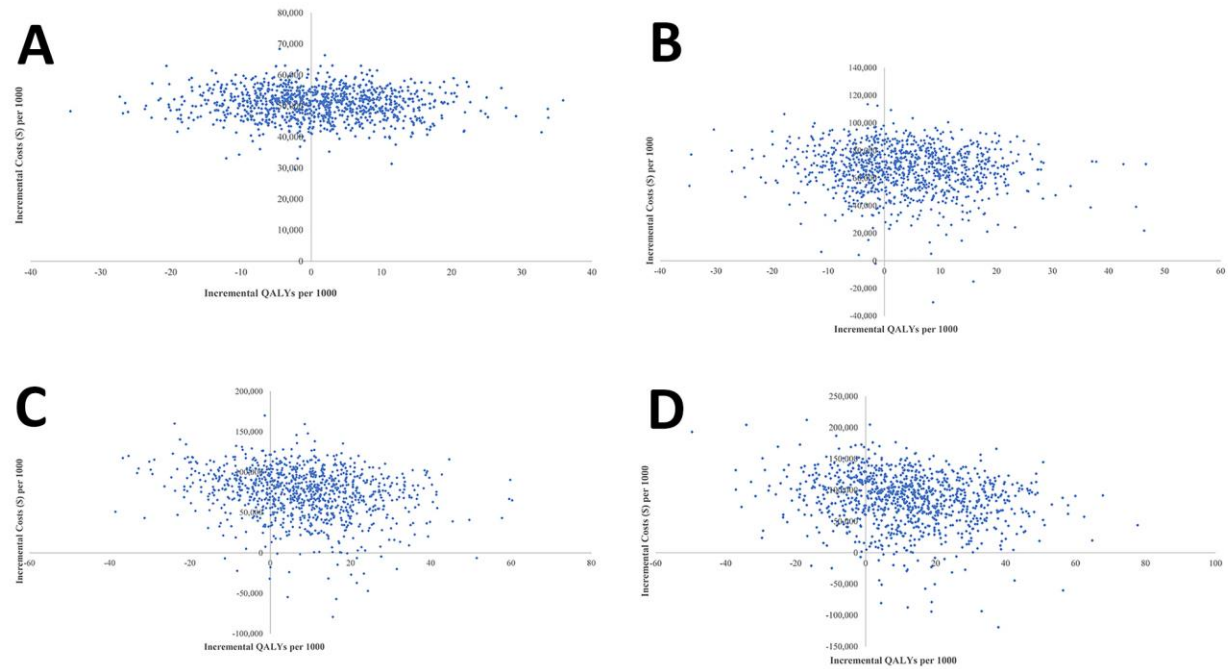

**Appendix Figure 2.** Cost-effectiveness planes demonstrating the variability in probabilistic sensitivity analysis replications for select intervention strategies in migrants from low incidence (A), moderate incidence (B), high incidence (C), and very high TB incidence (D) countries.

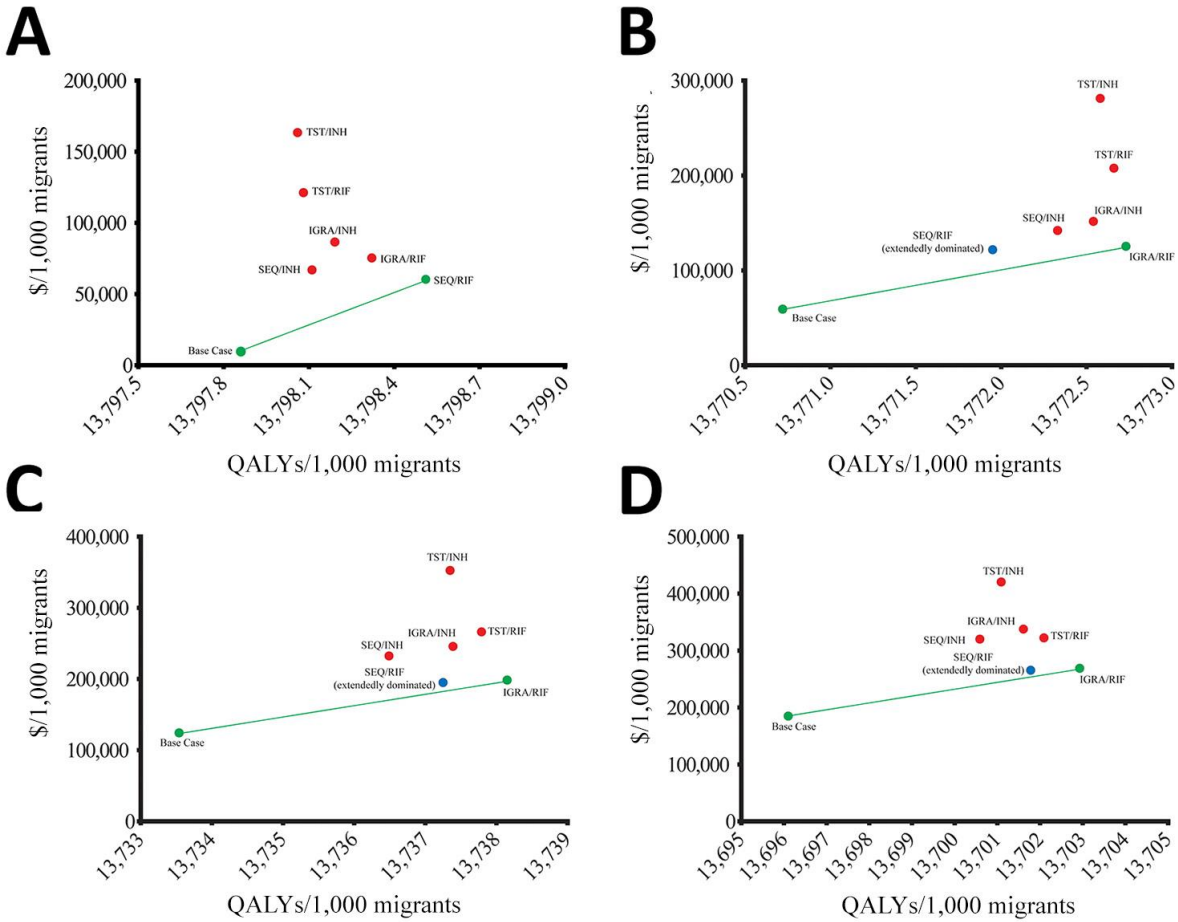

**Appendix Figure 3.** Efficiency frontier of population QALYs versus population costs among migrants from low (A), moderate (B), high (C), and very high (D) TB incidence countries. The frontier is read from left to right, with intervention strategies connected if they fall on the frontier. Those subsequent to the initial intervention strategy have an increased cost, but an increased benefit, and represent the next best value at increasing funding thresholds. The slope between 2 connected intervention strategies represents cost-effectiveness: a steeper slope represents poorer cost-effectiveness, while a shallow slope represents better cost-effectiveness. An intervention strategy that is extendedly dominated has a higher cost-per QALY gained and fewer population QALYs than the subsequent intervention on the frontier and is therefore less efficient. IGRA, interferon-gamma release assay; INH, isoniazid; QALY, quality-adjusted life year; RIF, rifampin; SEQ, sequential screening; TST, tuberculin skin test.
